# Supplementary material for: Prevalence and distribution pattern of Cryptosporidium spp. among pre-weaned diarrheic calves in the Republic of Korea
Source: PubMed Central journal article supplement (PMC8592421; doi:10.1371/journal.pone.0259824), 2021-11-15
Supplement: pone.0259824.s001.pdf [file pone.0259824.s001.pdf]

# PLOS ONE

## Prevalence and distribution of *Cryptosporidium* spp. among diarrheic calves in the Republic of Korea --Manuscript Draft--

|                                |                                                                                                                                                                                                                                                                                                                                                                                                                                                                                                                                                                                                                                                                                                                                                                                                                                                                                                                                                                                                                                                                                                                                                                                                                                                                                                                                                                                                                                                                                                                                                                                                                                                                                                                                                                                                                                                                                                                                                                                                                                                                                                                                                                                                                                                                                                                                                                                                                                                                                                                                                                                                                                                                                |
|--------------------------------|--------------------------------------------------------------------------------------------------------------------------------------------------------------------------------------------------------------------------------------------------------------------------------------------------------------------------------------------------------------------------------------------------------------------------------------------------------------------------------------------------------------------------------------------------------------------------------------------------------------------------------------------------------------------------------------------------------------------------------------------------------------------------------------------------------------------------------------------------------------------------------------------------------------------------------------------------------------------------------------------------------------------------------------------------------------------------------------------------------------------------------------------------------------------------------------------------------------------------------------------------------------------------------------------------------------------------------------------------------------------------------------------------------------------------------------------------------------------------------------------------------------------------------------------------------------------------------------------------------------------------------------------------------------------------------------------------------------------------------------------------------------------------------------------------------------------------------------------------------------------------------------------------------------------------------------------------------------------------------------------------------------------------------------------------------------------------------------------------------------------------------------------------------------------------------------------------------------------------------------------------------------------------------------------------------------------------------------------------------------------------------------------------------------------------------------------------------------------------------------------------------------------------------------------------------------------------------------------------------------------------------------------------------------------------------|
| <b>Manuscript Number:</b>      | PONE-D-21-26307                                                                                                                                                                                                                                                                                                                                                                                                                                                                                                                                                                                                                                                                                                                                                                                                                                                                                                                                                                                                                                                                                                                                                                                                                                                                                                                                                                                                                                                                                                                                                                                                                                                                                                                                                                                                                                                                                                                                                                                                                                                                                                                                                                                                                                                                                                                                                                                                                                                                                                                                                                                                                                                                |
| <b>Article Type:</b>           | Research Article                                                                                                                                                                                                                                                                                                                                                                                                                                                                                                                                                                                                                                                                                                                                                                                                                                                                                                                                                                                                                                                                                                                                                                                                                                                                                                                                                                                                                                                                                                                                                                                                                                                                                                                                                                                                                                                                                                                                                                                                                                                                                                                                                                                                                                                                                                                                                                                                                                                                                                                                                                                                                                                               |
| <b>Full Title:</b>             | Prevalence and distribution of <i>Cryptosporidium</i> spp. among diarrheic calves in the Republic of Korea                                                                                                                                                                                                                                                                                                                                                                                                                                                                                                                                                                                                                                                                                                                                                                                                                                                                                                                                                                                                                                                                                                                                                                                                                                                                                                                                                                                                                                                                                                                                                                                                                                                                                                                                                                                                                                                                                                                                                                                                                                                                                                                                                                                                                                                                                                                                                                                                                                                                                                                                                                     |
| <b>Short Title:</b>            | Different subtypes of <i>C. parvum</i> in calves with diarrhea                                                                                                                                                                                                                                                                                                                                                                                                                                                                                                                                                                                                                                                                                                                                                                                                                                                                                                                                                                                                                                                                                                                                                                                                                                                                                                                                                                                                                                                                                                                                                                                                                                                                                                                                                                                                                                                                                                                                                                                                                                                                                                                                                                                                                                                                                                                                                                                                                                                                                                                                                                                                                 |
| <b>Corresponding Author:</b>   | Kyoung-Seong Choi<br>Kyungpook National University<br>Sangju, KOREA, REPUBLIC OF                                                                                                                                                                                                                                                                                                                                                                                                                                                                                                                                                                                                                                                                                                                                                                                                                                                                                                                                                                                                                                                                                                                                                                                                                                                                                                                                                                                                                                                                                                                                                                                                                                                                                                                                                                                                                                                                                                                                                                                                                                                                                                                                                                                                                                                                                                                                                                                                                                                                                                                                                                                               |
| <b>Keywords:</b>               | <i>Cryptosporidium</i> ; pre-weaned calves; diarrhea; <i>C. parvum</i> ; gp60 subtypes                                                                                                                                                                                                                                                                                                                                                                                                                                                                                                                                                                                                                                                                                                                                                                                                                                                                                                                                                                                                                                                                                                                                                                                                                                                                                                                                                                                                                                                                                                                                                                                                                                                                                                                                                                                                                                                                                                                                                                                                                                                                                                                                                                                                                                                                                                                                                                                                                                                                                                                                                                                         |
| <b>Abstract:</b>               | <p><i>Cryptosporidium</i> spp. are protozoan parasites that cause diarrhea in humans and animals worldwide. Data on the prevalence of <i>Cryptosporidium</i> spp. and its subtypes among calves in the Republic of Korea (KOR) are sparse. Hence, our study aimed to investigate the prevalence and the association between the age of calf and the identified <i>Cryptosporidium</i> spp. and to determine the genotypes/subtypes of <i>Cryptosporidium</i> spp. in pre-weaned calves with diarrhea in the KOR. A total of 460 diarrheic fecal samples were collected from calves aged 1–60 days and screened for <i>Cryptosporidium</i> spp. by the 18S rRNA gene. Species identification was determined by the sequencing analysis of the 18S rRNA gene, and <i>C. parvum</i> -positive samples were subtyped by sequence analysis of the 60-kDa glycoprotein ( gp60 ) gene. Sequencing analysis based on the 18S rRNA gene revealed the presence of three <i>Cryptosporidium</i> spp., namely, <i>C. parvum</i> ( n = 72), <i>C. ryanae</i> ( n = 12), and <i>C. bovis</i> ( n = 2). Co-infection by these species was not observed. The infection rate was the highest in calves aged 11–20 days (26.1%, 95% CI 17.1–35.1), whereas the lowest rate was observed in calves aged 21–30 days (7.7%, 95% CI 0.0–16.1). The prevalence of <i>C. parvum</i> was detected exclusively in calves aged <math>\leq 20</math> days, and the highest infection rate of <i>C. ryanae</i> was seen in calves <math>\geq 31</math> days of age. The occurrence of <i>C. parvum</i> (<math>\chi^2 = 25.300</math>, <math>P = 0.000</math>) and <i>C. ryanae</i> (<math>\chi^2 = 18.020</math>, <math>P = 0.001</math>) was significantly associated with the age of the calves. Eleven different subtypes belonging to the family Ila were recognized: IlaA14G1R1, IlaA14G3R1, IlaA15G1R1, IlaA15G2R1, IlaA16G4R1, IlaA17G3R1, IlaA17G4R1, IlaA18G3R1, IlaA19G1R1, IlaA19G3R1, and IlaA19G4R1. Except for two (IlaA18G3R1 and IlaA15G2R1) subtypes, nine subtypes were first identified in calves with diarrhea in the KOR. IlaA18G3R1 was the most frequently detected subtype (72.2% of calves), followed by IlaA17G3R1 (5.6%), and IlaA15G2R1 (4.2%) and IlaA19G4R1 (4.2%). These results suggest that the prevalence of <i>Cryptosporidium</i> spp. is significantly associated with calf age. Furthermore, the findings demonstrate the high genetic diversity of <i>C. parvum</i> and the widespread occurrence of zoonotic <i>C. parvum</i> in pre-weaned calves. Hence, calves are a potential source of zoonotic transmission with considerable public health implications.</p> |
| <b>Order of Authors:</b>       | Dong-Hun Jang<br>Hyung-Chul Cho<br>Seung-Uk Shin<br>Eun-Mi Kim<br>Yu-Jin Park<br>Sunwoo Hwang<br>Jinho Park<br>Kyoung-Seong Choi                                                                                                                                                                                                                                                                                                                                                                                                                                                                                                                                                                                                                                                                                                                                                                                                                                                                                                                                                                                                                                                                                                                                                                                                                                                                                                                                                                                                                                                                                                                                                                                                                                                                                                                                                                                                                                                                                                                                                                                                                                                                                                                                                                                                                                                                                                                                                                                                                                                                                                                                               |
| <b>Additional Information:</b> |                                                                                                                                                                                                                                                                                                                                                                                                                                                                                                                                                                                                                                                                                                                                                                                                                                                                                                                                                                                                                                                                                                                                                                                                                                                                                                                                                                                                                                                                                                                                                                                                                                                                                                                                                                                                                                                                                                                                                                                                                                                                                                                                                                                                                                                                                                                                                                                                                                                                                                                                                                                                                                                                                |

| Question                                                                                                                                                                                                                                                                                                                                                                                                                                                                                                                                                                                                                                                                                                                                                                                                                                                                                                                                                                                                                                                                                                                                                                                                                                                                                                                                                                            | Response                                                                                                                                                                                                                                                                                                                               |
|-------------------------------------------------------------------------------------------------------------------------------------------------------------------------------------------------------------------------------------------------------------------------------------------------------------------------------------------------------------------------------------------------------------------------------------------------------------------------------------------------------------------------------------------------------------------------------------------------------------------------------------------------------------------------------------------------------------------------------------------------------------------------------------------------------------------------------------------------------------------------------------------------------------------------------------------------------------------------------------------------------------------------------------------------------------------------------------------------------------------------------------------------------------------------------------------------------------------------------------------------------------------------------------------------------------------------------------------------------------------------------------|----------------------------------------------------------------------------------------------------------------------------------------------------------------------------------------------------------------------------------------------------------------------------------------------------------------------------------------|
| <p><b>Financial Disclosure</b></p> <p>Enter a financial disclosure statement that describes the sources of funding for the work included in this submission. Review the <a href="#">submission guidelines</a> for detailed requirements. View published research articles from <a href="#">PLOS ONE</a> for specific examples.</p> <p>This statement is required for submission and <b>will appear in the published article</b> if the submission is accepted. Please make sure it is accurate.</p> <p><b>Unfunded studies</b><br/>Enter: <i>The author(s) received no specific funding for this work.</i></p> <p><b>Funded studies</b><br/>Enter a statement with the following details:</p> <ul style="list-style-type: none"> <li>• Initials of the authors who received each award</li> <li>• Grant numbers awarded to each author</li> <li>• The full name of each funder</li> <li>• URL of each funder website</li> <li>• Did the sponsors or funders play any role in the study design, data collection and analysis, decision to publish, or preparation of the manuscript?</li> <li>• <b>NO</b> - Include this sentence at the end of your statement: <i>The funders had no role in study design, data collection and analysis, decision to publish, or preparation of the manuscript.</i></li> <li>• <b>YES</b> - Specify the role(s) played.</li> </ul> <p>* typeset</p> | <p>Kyoungg-Seong CHoi</p> <p>: This research was supported by the Korea Institute of Planning and Evaluation for Technology in Food, Agriculture, and Forestry (IPET) (Grant No. 321016-01-1-HD020). The funders had no role in study design, data collection and analysis, decision to publish, or preparation of the manuscript.</p> |
| <p><b>Competing Interests</b></p> <p>Use the instructions below to enter a competing interest statement for this submission. On behalf of all authors, disclose any <a href="#">competing interests</a> that could be perceived to bias this work—acknowledging all financial support and any other relevant financial or non-financial competing interests.</p>                                                                                                                                                                                                                                                                                                                                                                                                                                                                                                                                                                                                                                                                                                                                                                                                                                                                                                                                                                                                                    | <p>No: The authors have declared that they no competing interests exit.</p>                                                                                                                                                                                                                                                            |

This statement is **required** for submission and **will appear in the published article** if the submission is accepted. Please make sure it is accurate and that any funding sources listed in your Funding Information later in the submission form are also declared in your Financial Disclosure statement.

View published research articles from [PLOS ONE](#) for specific examples.

#### **NO authors have competing interests**

Enter: *The authors have declared that no competing interests exist.*

#### **Authors with competing interests**

Enter competing interest details beginning with this statement:

*I have read the journal's policy and the authors of this manuscript have the following competing interests: [insert competing interests here]*

\* typeset

#### **Ethics Statement**

Enter an ethics statement for this submission. This statement is required if the study involved:

- Human participants
- Human specimens or tissue
- Vertebrate animals or cephalopods
- Vertebrate embryos or tissues
- Field research

Write "N/A" if the submission does not require an ethics statement.

General guidance is provided below. Consult the [submission guidelines](#) for detailed instructions. **Make sure that all information entered here is included in the Methods section of the manuscript.**

All animal procedures were conducted according to ethical guidelines for the use of animal samples, and were approved by the Jeonbuk National University (Institutional Animal Care and Use Committee Decision No. CBNU 2020-052). All procedures and possible consequences were explained to the managers of the surveyed farm, and written consent was obtained.

### Format for specific study types

#### Human Subject Research (involving human participants and/or tissue)

- Give the name of the institutional review board or ethics committee that approved the study
- Include the approval number and/or a statement indicating approval of this research
- Indicate the form of consent obtained (written/oral) or the reason that consent was not obtained (e.g. the data were analyzed anonymously)

#### Animal Research (involving vertebrate animals, embryos or tissues)

- Provide the name of the Institutional Animal Care and Use Committee (IACUC) or other relevant ethics board that reviewed the study protocol, and indicate whether they approved this research or granted a formal waiver of ethical approval
- Include an approval number if one was obtained
- If the study involved *non-human primates*, add *additional details* about animal welfare and steps taken to ameliorate suffering
- If anesthesia, euthanasia, or any kind of animal sacrifice is part of the study, include briefly which substances and/or methods were applied

#### Field Research

Include the following details if this study involves the collection of plant, animal, or other materials from a natural setting:

- Field permit number
- Name of the institution or relevant body that granted permission

#### Data Availability

Authors are required to make all data underlying the findings described fully available, without restriction, and from the time of publication. PLOS allows rare exceptions to address legal and ethical concerns. See the [PLOS Data Policy](#) and [FAQ](#) for detailed information.

Yes - all data are fully available without restriction

A Data Availability Statement describing where the data can be found is required at submission. Your answers to this question constitute the Data Availability Statement and **will be published in the article**, if accepted.

**Important:** Stating 'data available on request from the author' is not sufficient. If your data are only available upon request, select 'No' for the first question and explain your exceptional situation in the text box.

Do the authors confirm that all data underlying the findings described in their manuscript are fully available without restriction?

**Describe where the data may be found in full sentences. If you are copying our sample text, replace any instances of XXX with the appropriate details.**

- If the data are **held or will be held in a public repository**, include URLs, accession numbers or DOIs. If this information will only be available after acceptance, indicate this by ticking the box below. For example: *All XXX files are available from the XXX database (accession number(s) XXX, XXX).*
- If the data are all contained **within the manuscript and/or Supporting Information files**, enter the following: *All relevant data are within the manuscript and its Supporting Information files.*
- If neither of these applies but you are able to provide **details of access elsewhere**, with or without limitations, please do so. For example:

*Data cannot be shared publicly because of [XXX]. Data are available from the XXX Institutional Data Access / Ethics Committee (contact via XXX) for researchers who meet the criteria for access to confidential data.*

*The data underlying the results presented in the study are available*

All relevant data are within the manuscript and its Supporting Information files.

|                                                                                                                                                                                                                                                                                   |                                                                                                                                                                                  |
|-----------------------------------------------------------------------------------------------------------------------------------------------------------------------------------------------------------------------------------------------------------------------------------|----------------------------------------------------------------------------------------------------------------------------------------------------------------------------------|
| <p><i>from (include the name of the third party and contact information or URL).</i></p> <ul style="list-style-type: none"><li>• This text is appropriate if the data are owned by a third party and authors do not have permission to share the data.</li></ul> <p>* typeset</p> |                                                                                                                                                                                  |
| Additional data availability information:                                                                                                                                                                                                                                         | Tick here if the URLs/accession numbers/DOIs will be available only after acceptance of the manuscript for publication so that we can ensure their inclusion before publication. |

1  
2  
3  
4  
5  
6  
7  
8  
9  
10  
11  
12  
13  
14  
15  
16  
17  
18  
19  
20  
21  
22

**Prevalence and distribution of *Cryptosporidium* spp. among diarrheic calves in the Republic of Korea**

**Dong-Hun Jang<sup>1</sup>, Hyung-Chul Cho<sup>1</sup>, Seung-Uk Shin<sup>1</sup>, Eun-Mi Kim<sup>1</sup>, Yu-Jin Park<sup>2</sup>, Sunwoo Hwang<sup>1</sup>, and Jinho Park<sup>3</sup>, Kyoung-Seong Choi<sup>1,2\*</sup>**

<sup>1</sup>Department of Animal Science and Biotechnology, College of Ecology and Environmental Science, Kyungpook National University, Sangju 37224, Republic of Korea

<sup>2</sup>Department of Horse/Companion and Wild animals, College of Ecology and Environmental Science, Kyungpook National University, Sangju 37224, Republic of Korea

<sup>3</sup>College of Veterinary Medicine, Jeonbuk National University, Iksan 54596, Republic of Korea

\*Correspondence should be addressed to:

Kyoung-Seong Choi, DVM, MS, PhD

College of Ecology and Environmental Science

Kyungpook National University

Sangju 37224, Republic of Korea

Tel: 82-54-530-1222

Fax: 82-54-530-1959

E-mail: [kschoi3@knu.ac.kr](mailto:kschoi3@knu.ac.kr)

23 **Abstract**

24 *Cryptosporidium* spp. are protozoan parasites that cause diarrhea in humans and  
25 animals worldwide. Data on the prevalence of *Cryptosporidium* spp. and its subtypes among  
26 calves in the Republic of Korea (KOR) are sparse. Hence, our study aimed to investigate the  
27 prevalence and the association between the age of calf and the identified *Cryptosporidium* spp.  
28 and to determine the genotypes/subtypes of *Cryptosporidium* spp. in pre-weaned calves with  
29 diarrhea in the KOR. A total of 460 diarrheic fecal samples were collected from calves aged  
30 1–60 days and screened for *Cryptosporidium* spp. by the 18S rRNA gene. Species identification  
31 was determined by the sequencing analysis of the 18S rRNA gene, and *C. parvum*-positive  
32 samples were subtyped by sequence analysis of the 60-kDa glycoprotein (*gp60*) gene.  
33 Sequencing analysis based on the 18S rRNA gene revealed the presence of three  
34 *Cryptosporidium* spp., namely, *C. parvum* ( $n = 72$ ), *C. ryanae* ( $n = 12$ ), and *C. bovis* ( $n = 2$ ).  
35 Co-infection by these species was not observed. The infection rate was the highest in calves  
36 aged 11–20 days (26.1%, 95% CI 17.1–35.1), whereas the lowest rate was observed in calves  
37 aged 21–30 days (7.7%, 95% CI 0.0–16.1). The prevalence of *C. parvum* was detected  
38 exclusively in calves aged  $\leq 20$  days, and the highest infection rate of *C. ryanae* was seen in  
39 calves  $\geq 31$  days of age. The occurrence of *C. parvum* ( $\chi^2 = 25.300$ ,  $P = 0.000$ ) and *C. ryanae*  
40 ( $\chi^2 = 18.020$ ,  $P = 0.001$ ) was significantly associated with the age of the calves. Eleven different  
41 subtypes belonging to the family IIa were recognized: IIaA14G1R1, IIaA14G3R1,  
42 IIaA15G1R1, IIaA15G2R1, IIaA16G4R1, IIaA17G3R1, IIaA17G4R1, IIaA18G3R1,  
43 IIaA19G1R1, IIaA19G3R1, and IIaA19G4R1. Except for two (IIaA18G3R1 and IIaA15G2R1)  
44 subtypes, nine subtypes were first identified in calves with diarrhea in the KOR. IIaA18G3R1  
45 was the most frequently detected subtype (72.2% of calves), followed by IIaA17G3R1 (5.6%),



46 and IIaA15G2R1 (4.2%) and IIaA19G4R1 (4.2%). These results suggest that the prevalence of  
47 *Cryptosporidium* spp. is significantly associated with calf age. Furthermore, the findings  
48 demonstrate the high genetic diversity of *C. parvum* and the widespread occurrence of zoonotic  
49 *C. parvum* in pre-weaned calves. Hence, calves are a potential source of zoonotic transmission  
50 with considerable public health implications.

51

52 **Keywords:** *Cryptosporidium*, pre-weaned calves, diarrhea, *C. parvum*, *gp60* subtypes

53

## 54 **Introduction**

55 *Cryptosporidium* spp. are protozoan parasites that cause mild-to-severe diarrhea in  
56 humans and a wide range of animals [1]. Infections with these parasites occur via the fecal-oral  
57 route either by direct contact with infected animals or by the ingestion of infective oocysts from  
58 contaminated water or food [2-5]. To date, 40 *Cryptosporidium* spp. have been described [6],  
59 and among them, four species, namely, *C. andersoni*, *C. bovis*, *C. parvum*, and *C. ryanae*, have  
60 been identified in cattle. The distribution of these species is known to vary according to age [4,  
61 7]. In particular, *C. parvum* is one of the most important pathogens causing diarrhea in neonatal  
62 calves worldwide and leads to severe economic losses owing to poor growth, decreased  
63 productivity, and even death [8]. Moreover, *C. parvum* is the major pathogenic species that  
64 affects humans [9, 10]. Unlike *C. parvum*, *C. bovis* and *C. ryanae* usually infect post-weaned  
65 calves and yearlings without causing illness, and *C. andersoni* is mainly found in adult cattle  
66 [11-13]. The pathogenicity of *C. bovis*, and *C. ryanae* in post-weaned calves has not been  
67 established [9]. The oocysts of *C. parvum*, *C. bovis*, and *C. ryanae* are similar in size and shape.  
68 While *C. ryanae* is smaller than the others and requires molecular methods for its determination  
69 [14, 15], *C. andersoni* is larger in size and infects the abomasum [16].

70 According to the subtyping of *C. parvum* based on sequence analysis of the 60-kDa  
71 glycoprotein (*gp60*) gene, IIa and IIc subtypes have been detected in both humans and calves  
72 and can cause zoonotic cryptosporidiosis [17]. The IIa subtype is mostly identified in calves,  
73 and IIaA15G2R1 is the predominant subtype [7] globally, including the Republic of Korea  
74 (KOR) [18]. The IIc subtype is usually found in lambs and goat kids [4, 19] and has been  
75 described in calves in some countries such as Sweden, Turkey, Egypt, and China [20-23]. To  
76 date, most investigations of cryptosporidiosis in calves caused by *C. parvum* have focused on

77 the IIa subtype in most countries. However, there are a few studies on *C. parvum* subtypes in  
78 calves in the KOR [18, 24].

79 *Cryptosporidium parvum* infects the intestinal mucosa and accounts for over 90% of  
80 *Cryptosporidium* infections in neonatal calves [23]. In contrast, in pre-weaned calves, the  
81 prevalence of *C. bovis* and *C. ryanae* and their effects on causing diarrhea remain unclear.  
82 Several studies have reported that *C. bovis* and *C. ryanae* are present in pre-weaned calves [23,  
83 25, 26] and that *C. ryanae* infections are particularly associated with moderate diarrhea in pre-  
84 weaned calves [23]. However, little is known about the association between *C. bovis* and  
85 diarrhea. In addition, a previous study has indicated that the high prevalence of *C. bovis* and *C.*  
86 *ryanae* in hemorrhagic diarrhea was found in the KOR [24]. Nevertheless, the pathogenicity of  
87 these organisms is still unclear. Therefore, this study aimed to investigate the prevalence of  
88 *Cryptosporidium* spp. in pre-weaned calves with diarrhea and to evaluate the association  
89 between the age of calf and the identified *Cryptosporidium* spp. Furthermore, we intended to  
90 determine genotype of *Cryptosporidium* spp. and subtyping of *C. parvum* in calves in the KOR  
91 and to assess the significance of calves as a source of human infections.

92

93 **Materials and methods**

94 **Ethics statement**

95 All animal procedures were conducted according to ethical guidelines for the use of  
96 animal samples, and were approved by the Jeonbuk National University (Institutional Animal  
97 Care and Use Committee Decision No. CBNU 2020-052). All procedures and possible  
98 consequences were explained to the managers of the surveyed farm, and written consent was  
99 obtained.

100

101 **Sample collection**

102 Between August 2019 and August 2020, fresh fecal samples were collected directly  
103 from the rectum of 460 diarrheic pre-weaned calves (up to 60 days of age) by an experienced  
104 veterinarian using sterile plastic gloves in 11 different farms located in the KOR. The samples  
105 were placed in labeled sterile plastic tubes and transported to the Animal Immunology  
106 Laboratory of Kyungpook National University in a cooler with ice packs. Upon arrival,  
107 sampling date, age, animal identification number, and fecal consistency (pasty, loose, watery,  
108 or hemorrhagic) were recorded for each animal. The collected feces were mostly pasty or loose.  
109 Prior to DNA extraction, all feces were stored at 4°C for no more than 2 days. The fecal samples  
110 were divided according to age as follows; 1–10 days ( $n = 271$ ), 11–20 days ( $n = 92$ ), 21–30  
111 days ( $n = 39$ ), and  $\geq 31$  days ( $n = 58$ ). No microscopic examination was performed. 

112

113 **DNA extraction, molecular analysis, and sequencing**

114 DNA was extracted from  200 mg of each fecal sample using the QIAamp Fast DNA  
115 Stool Mini Kit (Qiagen, Hilden, Germany) according to the manufacturer's instructions and

116 frozen at  $-20^{\circ}\text{C}$  until use. The *Cryptosporidium* spp. were first tested using the 18S rRNA gene  
117 [27]. Samples that yielded positive results for *Cryptosporidium* spp. were further tested using  
118 species-specific primers [24]. After that, *C. parvum* was again subtyped using a nested PCR  
119 targeting the 60-kDa glycoprotein (*gp60*) gene [4, 28]. All positive PCR products were purified  
120 using the AccuPower PCR Purification Kit (Bioneer, Daejeon, KOR) and employed for direct  
121 sequencing (Macrogen, Daejeon, KOR). The nucleotide sequences obtained in this study were  
122 analyzed using BioEdit (version 7.2.5) and compared with the reference sequences using the  
123 Basic Local Alignment Search Tool available at the National Center for Biotechnology  
124 Information database. To determine the subtype of *C. parvum*, nucleotide sequences were  
125 aligned using ClustalX and then analyzed via direct comparison with reference sequences from  
126 GenBank. Since the base sequences of *C. bovis* and *C. ryanae* are similar, all positive samples  
127 of the 18S rRNA gene were separated by comparing the sequences. In this study, only samples  
128 showing a good sequencing result were considered positive for each *Cryptosporidium* spp. All  
129 nucleotide sequences generated in this study were deposited in the GenBank database with  
130 appropriate accession numbers (18S rRNA: MZ736386–MZ736399; *gp60*:  
131 MZ736314–MZ736385).

132

### 133 **Statistical analysis**

134 Statistical analysis was performed using SPSS Statistics 26 software package for  
135 Windows (SPSS Inc, Chicago, IL, USA). Chi-square test was used to determine the association  
136 between the prevalence of each species and age. A *p*-value of less than 0.05 was considered  
137 statistically significant.

138

## 139 **Results**

### 140 **Prevalence of *Cryptosporidium* spp.**

141 Among the 460 diarrheic fecal samples examined, 86 (18.7%) were positive for  
142 *Cryptosporidium* spp. on PCR analysis and sequencing based on the 18S rRNA gene. Three  
143 *Cryptosporidium* spp. were identified in pre-weaned Korean native calves (Table 1). Of these,  
144 *C. parvum* (15.7%, 72/460) was the most detected, followed by *C. ryanae* (2.6%, 12/460) and  
145 *C. bovis* (0.4%, 2/460). Co-infection of these species was not observed. The prevalence of the  
146 three *Cryptosporidium* spp. was compared according to the age groups. As shown in Table 1,  
147 the infection rate of *Cryptosporidium* spp. was highest in calves aged 11–20 days (26.1%, 95%  
148 CI 17.1–35.1), whereas the lowest infection rate was observed in calves aged 21–30 days (7.7%,  
149 95% CI 0.0–16.1). All three *Cryptosporidium* spp. were detected only in calves aged 1–10 days  
150 (Table 1). The association between *Cryptosporidium* spp. and age-distribution was investigated.  
151 Interestingly, the identified *Cryptosporidium* spp. varied according to the age of the calves. *C.*  
152 *parvum* infection was detected exclusively in calves  $\leq 20$  days of age (Table 2). The prevalence  
153 peaked at the age of 11–20 days and decreased rapidly thereafter (Table 2). *C. parvum* infection  
154 was significantly associated with the age of the calves ( $\chi^2 = 25.300$ ,  $P = 0.000$ ). Unlike *C.*  
155 *parvum*, *C. ryanae* was found in all age groups, and the highest infection rate was observed at  
156  $\geq 31$  days of age (Table 2). *C. ryanae* infection also had a significant age-related distribution  
157 ( $\chi^2 = 18.020$ ,  $P = 0.001$ ). In contrast, *C. bovis* was detected only in two calves aged 10 days  
158 and 35 days, and there was no statistical significance in the age-related distribution ( $P = 0.590$ ).

159

### 160 **Distribution of *Cryptosporidium* spp. and *C. parvum* subtypes**

161 All 72 *C. parvum*-positive samples were successfully amplified and subtyped by

162 sequence analysis of the *gp60* gene. A total of 11 different subtypes belonging to the family IIa  
163 were identified (Table 3). Subtype family IId was not detected. The distinction of each subtype  
164 within the IIa was in the number of trinucleotide region of TCA and TGA repeats (i.e., had one  
165 copy of sequence ACATCA immediately after the trinucleotide repeats). As shown in Table 3,  
166 in pre-weaned Korean native calves, the most frequently detected subtype was IIaA18G3R1  
167 (72.2%), followed by IIaA17G3R1 (5.6%), and then IIaA15G2R1 (4.2%) and IIaA19G4R1  
168 (4.2%). Other subtypes, namely, IIaA14G1R1 (1.4%), IIaA14G3R1 (1.4%), IIaA15G1R1  
169 (1.4%), IIaA16G4R1 (2.8%), IIaA17G4R1 (2.8%), IIaA19G1R1 (1.4%), and IIaA19G3R1  
170 (2.8%) were also identified. There was not much of a correlation between calf age and a specific  
171 subtype. IIaA19G4R1 was observed only in calves aged 1–10 days, whereas IIaA17G3R1 was  
172 found exclusively in calves aged 11–20 days. There were more various subtypes found in  
173 calves aged 1–10 days (Table 3). The most predominant subtype, IIaA18G3R1, was seen in all  
174 ages. This is the first report on the various zoonotic subtypes circulating in the KOR.

175         Based on the 18S rRNA gene, 14 (12 *C. ryanae* and 2 *C. bovis*) sequences were  
176 obtained and compared with the published literature. Twelve sequences of *C. ryanae* showed  
177 95.1%–100% similarity with each other. The *C. ryanae* sequences shared 95.7%–100%  
178 identity with those found in Austria, China, India, Thailand, and Japan. Two sequences of *C.*  
179 *bovis* shared 94.1% similarity. These sequences demonstrated 95.5%–96.2% identity with  
180 those identified previously in the KOR and had 91.9%–96.2% homology with those from  
181 Austria, USA, Japan, and China. Interestingly, differences in nucleotides between *C. ryanae*  
182 and *C. bovis* were observed. As shown in Fig. 1, the nucleotides in the six positions, i.e., 440,  
183 460, 464–466, and 470 were different between the two species.

184

185 **Discussion**

186 *Cryptosporidium*, along with rotavirus, has been well recognized as the main pathogen  
187 causing diarrhea in neonatal calves worldwide [29]. Our findings established the prevalence of  
188 *Cryptosporidium* spp. in pre-weaned diarrheic calves according to age, and the presence of  
189 various zoonotic subtypes of *C. parvum* in the KOR were identified. In the present study, the  
190 overall prevalence of *Cryptosporidium* spp. was found to be 18.7%, which is higher than that  
191 reported previously in the KOR [18, 24, 30]. These variations could be explained by the age of  
192 the animals, time of sample collection, and the differences in geographical location. However,  
193 the percentage of *Cryptosporidium* spp.-positive samples found in our study was lower than  
194 that reported in other countries such as Germany (88.9%), Japan (83.8%), China (38.4%), Italy  
195 (38.8%), Colombia (26.6%), Argentina (22.5%), and Estonia (22.6%) [25, 31-36].

196 In this study, the presence of three *Cryptosporidium* spp. in pre-weaned Korean native  
197 calves was ascertained: *C. bovis*, *C. parvum*, and *C. ryanae*. Of them, *C. parvum* was the most  
198 predominant species in the KOR. This finding agrees with the results observed in several other  
199 countries [7, 25, 32, 35, 37, 38]. Most studies have proven that *C. parvum* mainly infects calves  
200 up to 1 month of age [32, 39-42]. The results of the present study demonstrated that *C. parvum*  
201 was detected only in calves aged  $\leq 20$  days, and the infection rate was the highest in calves aged  
202 11–20 days. This observation is consistent with a previous study performed by our group [18].  
203 According to our findings, *C. parvum* was not detected in calves over 21 days of age. It is  
204 speculated that calves in this age group are less susceptible to *C. parvum* infection owing to  
205 the partial development of the immune system with increasing age, which reduces the effects  
206 compared to the neonatal calves. Moreover, *C. parvum* is known to cause watery diarrhea [23,  
207 29]. In this study, the number of animals with watery feces was small; hence, the association



208 with diarrhea was not evaluated. Although we were not able to compare the occurrence of *C.*  
209 *parvum* with the diarrhea status, *C. parvum* was found to be the causative agent of diarrhea in  
210 young calves. Our results suggest that *C. parvum* infection is attributed to the significant age-  
211 related distribution ( $P = 0.000$ ). Consequently, *C. parvum* was strongly associated with diarrhea  
212 in calves aged  $\leq 20$  days.

213 *Cryptosporidium ryanae* was the second most frequently detected species in pre-  
214 weaned Korean native calves. In general, *C. ryanae* is often found in post-weaned calves [15].  
215 The results revealed that *C. ryanae* was detected in all age groups with a low prevalence and  
216 that its occurrence increased with age. Especially, the infection rate of *C. ryanae* was the  
217 highest in calves aged  $\geq 31$  days. The prevalence of *C. ryanae* found in this study was similar  
218 to that of a previous study performed in the KOR [24]. Our observation confirmed that *C.*  
219 *ryanae* has an age-associated distribution, similar to *C. parvum*. A recent study has reported  
220 that *C. ryanae* was common in pre-weaned as well as post-weaned calves and that the infection  
221 was associated with the occurrence of moderate diarrhea in pre-weaned calves [23]. In contrast,  
222 other studies have shown that *C. ryanae* was not associated with diarrhea [26, 38, 43]. So far,  
223 the pathogenicity of *C. ryanae* is controversial. A previous study conducted in the KOR  
224 demonstrated that although it is not a single infection, the prevalence of *C. ryanae* was  
225 significantly high in hemorrhagic diarrhea [24]. We could not arrive at a conclusion regarding  
226 the correlation with diarrhea since the number of *C. ryanae*-positive samples from diarrheic  
227 calves was small. Hence, *C. ryanae* infection may cause diarrhea in calves  $\geq 21$  days of age and  
228 should be considered as a causative agent of diarrhea in this age group. Further studies are  
229 necessary to clarify the pathogenicity of *C. ryanae* in pre-weaned calves.

230 We found that the prevalence of *C. bovis* was the lowest in pre-weaned Korean native

231 calves. This observation is contradictory to the results reported by several studies in which *C.*  
232 *bovis* was the dominant species in pre-weaned calves [20, 44-47]. In this study, *C. bovis* was  
233 detected only in two calves aged 10 and 35 days. Several studies have stated that *C. bovis* is  
234 common in 2–3-week-old calves [41, 43]. However, our result signified that *C. bovis* was not  
235 detected in this age (Table 1). Cai et al. mentioned that *C. bovis* usually appears after weaning  
236 and that the infection can last weeks or months and contribute to the small increase in  
237 *Cryptosporidium* infection rates soon after weaning [26]. This observation may also explain  
238 the low prevalence of *C. bovis* in the present study. To date, information on the prevalence and  
239 clinical signs of *C. bovis* infection in both pre-weaned and post-weaned calves is very limited  
240 in the KOR. *C. bovis* could have probably been considered to be less important than *C. parvum*  
241 and therefore overlooked as an etiological agent of diarrhea in calves. Moreover, the results  
242 revealed that infection by *C. bovis*, unlike the two other species, was not age-related. Most  
243 importantly, the involvement of *C. bovis* in diarrhea remains unclear. Unlike *C. ryanae*, many  
244 studies have suggested that *C. bovis* was associated with diarrhea [23, 26, 38, 48]. However,  
245 infection by *C. bovis/C. ryanae* may lead to clinical signs owing to the presence of *C. parvum*  
246 [32]. Therefore, the prevalence and pathogenicity of *C. bovis* in pre-weaned and post-weaned  
247 calves must be investigated through large-scale epidemiological surveys.

248 *C. parvum* IIA family is common in humans as well as calves and is considered  
249 potentially zoonotic. To date, three *C. parvum* subtypes have been detected in calves in the  
250 KOR [18, 24], whereas one subtype (IIaA16G3R1) was not found in this study. In addition to  
251 the two subtypes (IIaA15G2R1 and IIaA18G3R1) described above, nine other subtypes  
252 (IIaA14G1R1, IIaA14G3R1, IIaA15G1R1, IIaA16G4R1, IIaA17G3R1, IIaA17G4R1,  
253 IIaA19G1R1, IIaA19G3R1, and IIaA19G4R1) that have not previously been detected in the

254 KOR were identified for the first time, showing the presence of high genetic diversity. Among  
255 them, IIAA18G3R1 was most commonly found in pre-weaned Korean native calves with  
256 diarrhea. This result is inconsistent with that of a previous study in which IIAA15G2R1 was  
257 shown as the predominant subtype [18]. This difference could be attributed to the fact that in  
258 the previous study, both normal and diarrheic feces were used and that IIAA15G2R1 was  
259 detected regardless of diarrhea [18]. Other variations are due to the differences in the season of  
260 sampling, regions, the number of samples, and herd management. IIAA15G2R1 has been  
261 known as the most prevalent *C. parvum* subtype infecting humans and cattle in many countries  
262 [7, 33, 49-53] and has also been detected in calves without diarrhea [18, 32, 54]. There seems  
263 to be no relationship between the subtype and diarrhea. In the present study, IIAA15G2R1 was  
264 detected only in three calves with diarrhea and the third frequent subtype along with  
265 IIAA19G4R1.

266 Here, IIAA18G3R1 was the dominant subtype that accounted for 72.2% of *C. parvum*-  
267 infected pre-weaned Korean native calves and was the frequent cause of human  
268 cryptosporidiosis, besides being reported in calves and foals [55-60]. The second common  
269 subtype in the KOR, IIAA17G3R1, has been found in calves and humans in several countries  
270 [61-65]. IIAA19G4R1 was the third frequent subtype identified in the pre-weaned Korean  
271 native calves and was also detected in small ruminants and fish as well as humans and calves  
272 [55, 64, 66-68]. Interestingly, all sequences belonging to the IIAA19G4R1 subtype were  
273 identical to those reported from other countries previously. These subtypes are considered to  
274 be the most common ones in calves in the KOR.

275 The other seven subtypes were also identified in pre-weaned Korean native calves with  
276 diarrhea, but their prevalence was relatively low. Subtypes IIAA14G1R1, IIAA14G3R1, and

277 IIA15G1R1 were each detected in one calf. IIA14G1R1 was identified in calves, goat kids,  
278 and humans [7, 12, 17, 19, 25, 33, 51, 52]. IIA14G3R1 was found in humans, calf, lambs, and  
279 fresh molluscan shellfish [19, 25, 69, 70]. IIA15G1R1 has been reported in humans [28, 51,  
280 52, 71, 72] as well as in cattle and goat kids [22, 73-75]. Subtypes IIA16G4R1 and  
281 IIA17G4R1 were each found in two calves in the current study. Unlike the other subtypes,  
282 IIA16G4R1 has so far been noted only in neonatal calf with diarrhea [76], which is  
283 consistent with our findings. Subtype IIA16G4R1 has not yet been detected in humans;  
284 however, it cannot be excluded the possibility that this may represent a significant health risk.  
285 IIA17G4R1 subtype has been identified in humans, cattle, and goats [31, 33, 59, 70, 76, 77]  
286 and has further been detected in diarrheic calves [31]. Finally, subtypes IIA19G1R1 and  
287 IIA19G3R1 have each been identified in one calf. IIA19G1R1 has been reported in humans,  
288 cattle, and sheep [35, 52, 63, 78-80]. IIA19G3R1 has been identified in humans, cattle, and  
289 deer [60, 81-84]. This study is the first to report the presence of various subtypes in pre-weaned  
290 calves in the KOR.

291 To detect *C. bovis* and *C. ryanae*, 18S rRNA and heat-shock protein 70 genes are  
292 generally used [15]. According to sequence analysis of the 18S rRNA gene, *C. bovis* and *C.*  
293 *ryanae* showed  $\geq 99\%$  identity, and it is not always possible to differentiate between them by  
294 PCR [85, 86]. However, in this study, we used only the 18S rRNA gene. Even without  
295 phylogenetic analysis, the difference between the two species could be confirmed by  
296 sequencing analysis. At the six nucleotide positions of 440, 460, 464–466, and 470, *C. bovis*  
297 had C, T, A, T, C, and A, while *C. ryanae* had T, C, G, C, T, and G. These positions are  
298 representative markers that distinguish *C. ryanae* from *C. bovis*. Our results suggest that these  
299 two species can be discerned using the 18S rRNA gene.

300

301 **Conclusion**

302 Our results confirm the presence of three *Cryptosporidium* spp. in pre-weaned calves  
303 with diarrhea: *C. bovis*, *C. parvum*, and *C. ryanae*. *C. parvum* was found to be the dominant  
304 species in young calves in the KOR. The occurrence of *C. ryanae* and *C. parvum*, but not *C.*  
305 *bovis*, in pre-weaned Korean native calves was significantly related to age; the prevalence of  
306 *C. parvum* decreased with age, whereas that of *C. ryanae* increased with age. The most  
307 frequently detected subtype in calves with diarrhea was IIAA18G3R1, which was responsible  
308 for zoonotic transmission. This is the first report to identify nine potentially zoonotic subtypes  
309 belonging to the family IIA, which have not previously been reported in cattle in the KOR. This  
310 study establishes the high genetic diversity of *C. parvum* in diarrheic calves and the widespread  
311 distribution of zoonotic *C. parvum* in the KOR. Therefore, the results emphasize that young  
312 calves may be a potential source of infection and may serve as an important zoonotic reservoir  
313 for human cryptosporidiosis.

314

315 **Acknowledgements**

316 Not applicable

317

318 **Author Contributions**

319 **Conceptualization:** Kyoung-Seong Choi, Jinho Park

320 **Data curation:** Kyoung-Seong Choi, Jinho Park

321 **Formal analysis:** Dong-Hun Jang, Hyung-Chul Cho, Seung-Uk Shin, Eun-Mi Kim<sup>1</sup>, Yu-Jin  
322 Park, Sunwoo Hwang,

323 **Methodology:** Dong-Hun Jang, Hyung-Chul Cho, Seung-Uk Shin, Eun-Mi Kim, Yu-Jin Park,  
324 Sunwoo Hwang

325 **Funding acquisition:** Kyoung-Seong Choi

326 **Writing – original draft:** Kyoung-Seong Choi,  
327

### 328 **Data Availability Statement**

329 All data generated or analyzed during this study are included in the article. The  
330 nucleotide sequence obtained in the present study has been deposited in the GenBank database  
331 under the accession numbers MZ736314–MZ736399.  
332

### 333 **Funding**

334 This research was supported by the Korea Institute of Planning and Evaluation for  
335 Technology in Food, Agriculture, and Forestry (IPET) (Grant No. 321016-01-1-HD020). The  
336 funders had no role in study design, data collection and analysis, decision to publish, or  
337 preparation of the manuscript.  
338

### 339 **Competing interests**

340 The authors have declared that they no competing interests exit.  
341

342 **References**

- 343 1. Fayer R (2004) *Cryptosporidium*: a water-borne zoonotic parasite. *Vet Parasitol* 126:  
344 37-56. <https://doi.org/10.1016/j.vetpar.2004.09.004> PMID: 15567578
- 345 2. Xiao L, Ryan UM (2004) Cryptosporidiosis: an update in molecular epidemiology.  
346 *Curr Opin Infect Dis* 17:483-490. [https://doi.org/10.1097/00001432-200410000-](https://doi.org/10.1097/00001432-200410000-00014)  
347 [00014](https://doi.org/10.1097/00001432-200410000-00014) PMID: 15353969
- 348 3. McLauchlin J, Amar C, Pedraza-Diaz S, Nichols GL (2000) Molecular  
349 epidemiological analysis of *Cryptosporidium* spp. in the United Kingdom: results of  
350 genotyping *Cryptosporidium* spp. in 1,705 fecal samples from humans and 105 fecal  
351 samples from livestock animals. *J Clin Microbiol* 38:3984-3990.  
352 <https://doi.org/10.1128/JCM.38.11.3984-3990.2000> PMID: 11060056
- 353 4. Xiao L (2010) Molecular epidemiology of cryptosporidiosis: an update. *Exp Parasitol*  
354 124:80-89. <https://doi.org/10.1016/j.exppara.2009.03.018> PMID: 19358845
- 355 5. Wells B, Shaw H, Hotchkiss E, Gilray J, Ayton R, Green J, et al. (2015) Prevalence,  
356 species identification and genotyping *Cryptosporidium* from livestock and deer in a  
357 catchment in the Cairngorms with a history of a contaminated public water supply.  
358 *Parasit Vectors* 8:66. <https://doi.org/10.1186/s13071-015-0684-x> PMID: 25650114
- 359 6. Feng Y, Ryan UM, Xiao L (2018) Genetic diversity and population structure of  
360 *Cryptosporidium*. *Trends Parasitol* 34:997-1011.  
361 <https://doi.org/10.1016/j.pt.2018.07.009> PMID: 30108020
- 362 7. Lichtmannsperger K, Harl J, Freudenthaler K, Hinney B, Wittek T, Joachim A (2020)  
363 *Cryptosporidium parvum*, *Cryptosporidium ryanae*, and *Cryptosporidium bovis* in  
364 samples from calves in Austria. *Parasitol Res* 119:4291-4295.

- 365 <https://doi.org/10.1007/s00436-020-06928-5> PMID: 33057813
- 366 8. Dessi G, Tamponi C, Varcasia A, Sanna G, Pipia AP, Carta S, et al. (2020)
- 367 *Cryptosporidium* infections in sheep farms from Italy. *Parasitol Res* 119:4211-4218.
- 368 <https://doi.org/10.1007/s00436-020-06947-2> PMID: 33140165
- 369 9. Thomson S, Hamilton CA, Hope JC, Katzer F, Mabbott NA, Morrison LJ, et al. (2017)
- 370 Bovine cryptosporidiosis: impact, host-parasite interaction and control strategies. *Vet*
- 371 *Res* 48:42. <https://doi.org/10.1186/s13567-017-0447-0> PMID: 28800747
- 372 10. Caffarena RD, Meireles MV, Carrasco-Letelier L, Picasso-Risso C, Santana BN, Riet-
- 373 Correa F, et al. (2020) Dairy calves in Uruguay are reservoirs of zoonotic subtypes of
- 374 *Cryptosporidium parvum* and pose a potential risk of surface water contamination.
- 375 *Front Vet Sci* 7:562. <https://doi.org/10.3389/fvets.2020.00562> PMID: 32974408
- 376 11. Aberg M, Emanuelson U, Troell K, Bjorkman C (2020). A single-cohort study of
- 377 *Cryptosporidium bovis* and *Cryptosporidium ryanae* in dairy cattle from birth to
- 378 calving. *Vet Parasitol Reg Stud Reports* 20:100400. [https://doi.org/doi:](https://doi.org/doi:10.1016/j.vprsr.2020.100400)
- 379 [10.1016/j.vprsr.2020.100400](https://doi.org/doi:10.1016/j.vprsr.2020.100400) PMID: 32448548
- 380 12. Yildirim A, Adanir R, Inci A, Yukari BA, Duzlu O, Onder Z, et al. (2020) Prevalence
- 381 and genotyping of bovine *Cryptosporidium* species in the Mediterranean and Central
- 382 Anatolia region of Turkey. *Comp Immunol Microbiol Infect Dis* 69:101425.
- 383 <https://doi.org/10.1016/j.cimid.2020.101425> PMID: 31978845
- 384 13. Liang N, Wu Y, Sun M, Chang Y, Lin X, Yu L, et al. (2019) Molecular epidemiology
- 385 of *Cryptosporidium* spp. in dairy cattle in Guangdong Province, South China.
- 386 *Parasitology* 146:28-32. <https://doi.org/10.1017/S0031182018001129> PMID:
- 387 29986775



- 388 14. Fayer R, Santin M, Xiao L (2005) *Cryptosporidium bovis* n. sp. (Apicomplexa:  
389 Cryptosporidiidae) in cattle (*Bos taurus*). J Parasitol 91:624-629.  
390 <https://doi.org/10.1645/GE-3435> PMID: 16108557
- 391 15. Fayer R, Santin M, Trout JM (2008) *Cryptosporidium ryanae* n. sp. (Apicomplexa:  
392 Cryptosporidiidae) in cattle (*Bos taurus*). Vet Parasitol 156:191-198.  
393 <https://doi.org/10.1016/j.vetpar.2008.05.024> PMID: 18583057
- 394 16. Peng MM, Wilson ML, Holland RE, Meshnick SR, Lal AA, Xiao L (2003) Genetic  
395 diversity of *Cryptosporidium* spp. in cattle in Michigan: implications for understanding  
396 the transmission dynamics. Parasitol Res 90:175-180. [https://doi.org/10.1007/s00436-](https://doi.org/10.1007/s00436-003-0834-5)  
397 [003-0834-5](https://doi.org/10.1007/s00436-003-0834-5) PMID: 12783304
- 398 17. Khan A, Shaik JS, Grigg ME (2018) Genomics and molecular epidemiology of  
399 *Cryptosporidium* species. Acta Trop 184:1-14.  
400 <https://doi.org/10.1016/j.actatropica.2017.10.023> PMID: 29111140
- 401 18. Lee YJ, Ryu JH, Shin SU, Choi KS (2019) Prevalence and molecular characterization  
402 of *Cryptosporidium* and *Giardia* in pre-weaned native calves in the Republic of Korea.  
403 Parasitol Res 118:3509-3517. <https://doi.org/10.1007/s00436-019-06482-9> PMID:  
404 31624910
- 405 19. Kabir MHB, Ceylan O, Ceylan C, Shehata AA, Bando H, Essa MI, et al. (2020)  
406 Molecular detection of genotypes and subtypes of *Cryptosporidium* infection in  
407 diarrheic calves, lambs, and goat kids from Turkey. Parasitol Int 79:102163.  
408 <https://doi.org/10.1016/j.parint.2020.102163> PMID: 32589940
- 409 20. Silverlas C, Naslund K, Bjorkman C, Mattsson JG (2010) Molecular characterisation  
410 of *Cryptosporidium* isolates from Swedish dairy cattle in relation to age, diarrhoea and

- 411 region. Vet Parasitol 169:289-295. <https://doi.org/10.1016/j.vetpar.2010.01.003> PMID:  
412 20138705
- 413 21. Muhid A, Robertson I, Ng J, Ryan U (2011) Prevalence of and management factors  
414 contributing to *Cryptosporidium sp.* infection in pre-weaned and post-weaned calves  
415 in Johor, Malaysia. Exp Parasitol 127:534-538.  
416 <https://doi.org/10.1016/j.exppara.2010.10.015> PMID: 21050848
- 417 22. Taylan-Ozkan A, Yasa-Duru S, Usluca S, Lysen C, Ye J, Roellig DM, et al. (2016)  
418 *Cryptosporidium* species and *Cryptosporidium parvum* subtypes in dairy calves and  
419 goat kids reared under traditional farming systems in Turkey. Exp Parasitol 170:16-20.  
420 <https://doi.org/10.1016/j.exppara.2016.06.014> PMID: 27373430
- 421 23. Li N, Wang R, Cai M, Jiang W, Feng Y, Xiao L (2019) Outbreak of cryptosporidiosis  
422 due to *Cryptosporidium parvum* subtype IIdA19G1 in neonatal calves on a dairy farm  
423 in China. Int J Parasitol 49:569-577. <https://doi.org/10.1016/j.ijpara.2019.02.006>  
424 PMID: 31071320
- 425 24. Lee SH, VanBik D, Kim HY, Lee YR, Kim JW, Chae M, et al. (2016) Multilocus typing  
426 of *Cryptosporidium spp.* in young calves with diarrhea in Korea. Vet Parasitol 229:81-  
427 89. <https://doi.org/10.1016/j.vetpar.2016.09.019> PMID: 27809984
- 428 25. Kabir MHB, Itoh M, Shehata AA, Bando H, Fukuda Y, Murakoshi F, et al. (2020)  
429 Distribution of *Cryptosporidium* species isolated from diarrhoeic calves in Japan.  
430 Parasitol Int 78:102153. <https://doi.org/10.1016/j.parint.2020.102153> PMID:  
431 32504804
- 432 26. Cai M, Guo Y, Pan B, Li N, Wang X, Tang C, et al. (2017) Longitudinal monitoring of  
433 *Cryptosporidium* species in pre-weaned dairy calves on five farms in Shanghai, China.

- 434 Vet Parasitol 241:14-19. <https://doi.org/10.1016/j.vetpar.2017.05.005> PMID:  
435 28579024
- 436 27. Cheun HI, Choi TK, Chung GT, Cho SH, Lee YH, Kimata I, et al. (2007) Genotypic  
437 characterization of *cryptosporidium* oocysts isolated from healthy people in three  
438 different counties of Korea. J Vet Med Sci 69:1099-1101.  
439 <https://doi.org/10.1292/jvms.69.1099> PMID: 17984603
- 440 28. Sulaiman IM, Hira PR, Zhou L, Al-Ali FM, Al-Shelahi FA, Shweiki HM, et al. (2005)  
441 Unique endemicity of cryptosporidiosis in children in Kuwait. J Clin Microbiol  
442 43:2805-2809. <https://doi.org/10.1128/JCM.43.6.2805-2809.2005> PMID: 15956401
- 443 29. Meganck V, Hoflack G, Piepers S, Opsomer G (2015) Evaluation of a protocol to  
444 reduce the incidence of neonatal calf diarrhoea on dairy herds. Prev Vet Med 118:64-  
445 70. <https://doi.org/10.1016/j.prevetmed.2014.11.007> PMID: 25475689
- 446 30. Lee SH, Kim HY, Choi EW, Kim D (2019) Causative agents and epidemiology of  
447 diarrhea in Korean native calves. J Vet Sci 20:e64.  
448 <https://doi.org/10.4142/jvs.2019.20.e64> PMID: 31775191
- 449 31. Avendano C, Ramo A, Vergara-Castiblanco C, Sanchez-Acedo C, Quilez J (2018)  
450 Genetic uniqueness of *Cryptosporidium parvum* from dairy calves in Colombia.  
451 Parasitol Res 117:1317-1323. <https://doi.org/10.1007/s00436-018-5818-6> PMID:  
452 29484550
- 453 32. Diaz P, Varcasia A, Pipia AP, Tamponi C, Sanna G, Prieto A, et al. (2018) Molecular  
454 characterisation and risk factor analysis of *Cryptosporidium* spp. in calves from Italy.  
455 Parasitol Res 117:3081-3090. <https://doi.org/10.1007/s00436-018-6000-x> PMID:  
456 30008134

- 457 33. Holzhausen I, Lendner M, Gohring F, Steinhofel I, Dauschies A (2019) Distribution  
458 of *Cryptosporidium parvum gp60* subtypes in calf herds of Saxony, Germany. Parasitol  
459 Res 118:1549-1558. <https://doi.org/10.1007/s00436-019-06266-1> PMID: 30790038
- 460 34. Lombardelli JA, Tomazic ML, Schnittger L, Tiranti KI (2019) Prevalence of  
461 *Cryptosporidium parvum* in dairy calves and *gp60* subtyping of diarrheic calves in  
462 Central Argentina. Parasitol Res 118:2079-2086. [https://doi.org/10.1007/s00436-019-](https://doi.org/10.1007/s00436-019-06366-y)  
463 [06366-y](https://doi.org/10.1007/s00436-019-06366-y) PMID: 31187226
- 464 35. Santoro A, Dorbek-Kolin E, Jeremejeva J, Tummeleht L, Orro T, Jokelainen P, et al.  
465 (2019) Molecular epidemiology of *Cryptosporidium* spp. in calves in Estonia: high  
466 prevalence of *Cryptosporidium parvum* shedding and 10 subtypes identified.  
467 Parasitology 146:261-267. <https://doi.org/10.1017/S0031182018001348> PMID:  
468 [30086806](https://doi.org/10.1017/S0031182018001348)
- 469 36. Wu Y, Zhang K, Zhang Y, Jing B, Chen Y, Xu C, et al. (2020) Genetic diversity of  
470 *Cryptosporidium parvum* in neonatal dairy calves in Xinjiang, China. Pathogens 9:  
471 692. <https://doi.org/10.3390/pathogens9090692> PMID: 32842484
- 472 37. Kaupke A, Rzezutka A (2015) Emergence of novel subtypes of *Cryptosporidium*  
473 *parvum* in calves in Poland. Parasitol Res 114:4709-4716.  
474 <https://doi.org/10.1007/s00436-015-4719-1> PMID: 26358098
- 475 38. Qi M, Zhang K, Huang M, Wang S, Xu C, Wang T, et al. (2020) Longitudinal detection  
476 of *Cryptosporidium* spp. in 1-10-week-old dairy calves on a farm in Xinjiang, China.  
477 Parasitol Res 119:3839-3844. <https://doi.org/10.1007/s00436-020-06904-z> PMID:  
478 [32996049](https://doi.org/10.1007/s00436-020-06904-z)
- 479 39. Santin M, Trout JM, Xiao L, Zhou L, Greiner E, Fayer R (2004) Prevalence and age-

- 480 related variation of *Cryptosporidium* species and genotypes in dairy calves. Vet  
481 Parasitol 122:103-117. <https://doi.org/10.1016/j.vetpar.2004.03.020> PMID: 15177715
- 482 40. Santin M (2013) Clinical and subclinical infections with *Cryptosporidium* in animals.  
483 N Z Vet J 61:1-10. <https://doi.org/10.1080/00480169.2012.731681> PMID: 23134088
- 484 41. Feng Y, Xiao L (2017) Molecular epidemiology of cryptosporidiosis in China. Front  
485 Microbiol 8:1701. <https://doi.org/10.3389/fmicb.2017.01701> PMID: 28932217
- 486 42. Tao W, Li Y, Yang H, Song M, Lu Y, Li W (2018) Widespread occurrence of zoonotic  
487 *Cryptosporidium* species and subtypes in dairy cattle from Northeast China: public  
488 health concerns. J Parasitol 104:10-17. <https://doi.org/10.1645/17-140> PMID:  
489 29088547
- 490 43. Wang R, Zhao G, Gong Y, Zhang L (2017) Advances and perspectives on the  
491 epidemiology of bovine *Cryptosporidium* in China in the past 30 years. Front  
492 Microbiol 8:1823. <https://doi.org/10.3389/fmicb.2017.01823> PMID: 28979256
- 493 44. Bjorkman C, Lindstrom L, Oweson C, Ahola H, Troell K, Axen C (2015)  
494 *Cryptosporidium* infections in suckler herd beef calves. Parasitology 142:1108-1114.  
495 <https://doi.org/10.1017/S0031182015000426> PMID: 2589955
- 496 45. Feng Y, Ortega Y, He G, Das P, Xu M, Zhang X, et al. (2007) Wide geographic  
497 distribution of *Cryptosporidium bovis* and the deer-like genotype in bovines. Vet  
498 Parasitol 144:1-9. <https://doi.org/10.1016/j.vetpar.2006.10.001> PMID: 17097231
- 499 46. Seppa-Lassila L, Orro T, Lassen B, Lasonen R, Autio T, Pelkonen S, et al. (2015)  
500 Intestinal pathogens, diarrhoea and acute phase proteins in naturally infected dairy  
501 calves. Comp Immunol Microbiol Infect Dis 41:10-16.  
502 <https://doi.org/10.1016/j.cimid.2015.05.004> PMID: 26264522

- 503 47. Rieux A, Paraud C, Pors I, Chartier C (2013) Molecular characterization of  
504 *Cryptosporidium* isolates from pre-weaned calves in Western France in relation to age.  
505 Vet Parasitol 197:7-12. <https://doi.org/10.1016/j.vetpar.2013.05.001> PMID: 23735428
- 506 48. Xu Z, Li N, Guo Y, Feng Y, Xiao L (2020) Comparative genomic analysis of three  
507 intestinal species reveals reductions in secreted pathogenesis determinants in bovine-  
508 specific and non-pathogenic *Cryptosporidium* species. Microb Genom 6:e000379.  
509 <https://doi.org/10.1099/mgen.0.000379> PMID: 32416746
- 510 49. Feng Y, Torres E, Li N, Wang L, Bowman D, Xiao L (2013) Population genetic  
511 characterisation of dominant *Cryptosporidium parvum* subtype IIaA15G2R1. Int J  
512 Parasitol 43:1141-1147. <https://doi.org/10.1016/j.ijpara.2013.09.002> PMID: 24126186
- 513 50. Ichikawa-Seki M, Aita J, Masatani T, Suzuki M, Nitta Y, Tamayose G, et al. (2015)  
514 Molecular characterization of *Cryptosporidium parvum* from two different Japanese  
515 prefectures, Okinawa and Hokkaido. Parasitol Int 64:161-166. <https://doi.org/10.1016/j.parint.2014.11.007> PMID: 25481361
- 516
- 517 51. Ramo A, Quilez J, Vergara-Castiblanco C, Monteagudo L, Del Cacho E, Clavel A  
518 (2015) Multilocus typing and population structure of *Cryptosporidium* from children  
519 in Zaragoza, Spain. Infect Genet Evol 31:190-197.  
520 <https://doi.org/10.1016/j.meegid.2015.01.023> PMID: 25660036
- 521 52. Soba B, Logar J (2008) Genetic classification of *Cryptosporidium* isolates from  
522 humans and calves in Slovenia. Parasitology 135:1263-1270. <https://doi.org/10.1017/S0031182008004800> PMID: 18664309
- 523
- 524 53. Valenzuela O, Gonzalez-Diaz M, Garibay-Escobar A, Burgara-Estrella A, Cano M,  
525 Durazo M, et al. (2014) Molecular characterization of *Cryptosporidium* spp. in

- 526 children from Mexico. PLoS One 9(4):e96128.  
527 <https://doi.org/10.1371/journal.pone.0096128> PMID: 24755606
- 528 54. Trotz-Williams LA, Martin DS, Gatei W, Cama V, Peregrine AS, Martin SW, et al.  
529 (2006) Genotype and subtype analyses of *Cryptosporidium* isolates from dairy calves  
530 and humans in Ontario. Parasitol Res 99:346-352. [https://doi.org/10.1007/s00436-006-](https://doi.org/10.1007/s00436-006-0157-4)  
531 [0157-4](https://doi.org/10.1007/s00436-006-0157-4) PMID: 16565813
- 532 55. Al Mawly J, Grinberg A, Velathanthiri N, French N (2015) Cross sectional study of  
533 prevalence, genetic diversity and zoonotic potential of *Cryptosporidium parvum*  
534 cycling in New Zealand dairy farms. Parasit Vectors 8:240.  
535 <https://doi.org/10.1186/s13071-015-0855-9> PMID: 25896433
- 536 56. Grinberg A, Learmonth J, Kwan E, Pomroy W, Lopez Villalobos N, Gibson I, et al.  
537 (2008) Genetic diversity and zoonotic potential of *Cryptosporidium parvum* causing  
538 foal diarrhea. J Clin Microbiol 46:2396-2398. <https://doi.org/10.1128/JCM.00936-08>  
539 PMID: 18508944
- 540 57. Inacio SV, Widmer G, de Brito RL, Zucatto AS, de Aquino MC, Oliveira BC, et al.  
541 (2017) First description of *Cryptosporidium hominis* gp60 genotype IkA20G1 and  
542 *Cryptosporidium parvum* gp60 genotypes IIaA18G3R1 and IIaA15G2R1 in foals in  
543 Brazil. Vet Parasitol 233:48-51. gp60 <https://doi.org/10.1016/j.vetpar.2016.11.021>  
544 PMID: 28043388
- 545 58. Ng JS, Pingault N, Gibbs R, Koehler A, Ryan U (2010) Molecular characterisation of  
546 *Cryptosporidium* outbreaks in Western and South Australia. Exp Parasitol 125:325-  
547 328. <https://doi.org/10.1016/j.exppara.2010.02.012> PMID: 20219461
- 548 59. Waldron LS, Power ML (2011) Fluorescence analysis detects gp60 subtype diversity

- 549 in *Cryptosporidium* infections. Infect Genet Evol 11:1388-1395. [https://doi.org/](https://doi.org/10.1016/j.meegid.2011.05.008)  
550 [10.1016/j.meegid.2011.05.008](https://doi.org/10.1016/j.meegid.2011.05.008) PMID: 21609784
- 551 60. Zintl A, Proctor AF, Read C, Dewaal T, Shanaghy N, Fanning S, et al. (2009) The  
552 prevalence of *Cryptosporidium* species and subtypes in human faecal samples in  
553 Ireland. Epidemiol Infect 137:270-277. <https://doi.org/10.1017/S0950268808000769>  
554 PMID: 18474128
- 555 61. Del Chierico F, Onori M, Di Bella S, Bordi E, Petrosillo N, Menichella D, et al. (2011)  
556 Cases of cryptosporidiosis co-infections in AIDS patients: a correlation between  
557 clinical presentation and *gp60* subgenotype lineages from aged formalin-fixed stool  
558 samples. Ann Trop Med Parasitol 105:339-349. [https://doi.org/](https://doi.org/10.1179/1364859411Y.0000000025)  
559 [10.1179/1364859411Y.0000000025](https://doi.org/10.1179/1364859411Y.0000000025) PMID: 21929875
- 560 62. Glaberman S, Moore JE, Lowery CJ, Chalmers RM, Sulaiman I, Elwin K, et al. (2002)  
561 Three drinking-water-associated cryptosporidiosis outbreaks, Northern Ireland. Emerg  
562 Infect Dis 8:631-633. <https://doi.org/10.3201/eid0806.010368> PMID: 12023922
- 563 63. Mammeri M, Chevillot A, Chenafi I, Thomas M, Julien C, Vallee I, et al. (2019)  
564 Molecular characterization of *Cryptosporidium* isolates from diarrheal dairy calves in  
565 France. Vet Parasitol Reg Stud Reports 18:100323.  
566 <https://doi.org/10.1016/j.vprsr.2019.100323> PMID: 31796198
- 567 64. Thompson HP, Dooley JS, Kenny J, McCoy M, Lowery CJ, Moore JE, et al. (2007)  
568 Genotypes and subtypes of *Cryptosporidium* spp. in neonatal calves in Northern  
569 Ireland. Parasitol Res 100:619-624. <https://doi.org/10.1007/s00436-006-0305-x> PMID:  
570 17031699
- 571 65. Waldron LS, Ferrari BC, Power ML (2009) Glycoprotein 60 diversity in *C. hominis*



- 572 and *C. parvum* causing human cryptosporidiosis in NSW, Australia. *Exp Parasitol*  
573 122:124-127. <https://doi.org/10.1016/j.exppara.2009.02.006> PMID: 19233175
- 574 66. Koinari M, Karl S, Ng-Hublin J, Lymbery AJ, Ryan UM (2013) Identification of novel  
575 and zoonotic *Cryptosporidium* species in fish from Papua New Guinea. *Vet Parasitol*  
576 198:1-9. <https://doi.org/10.1016/j.vetpar.2013.08.031> PMID: 24064001
- 577 67. Koinari M, Lymbery AJ, Ryan UM (2014) *Cryptosporidium* species in sheep and goats  
578 from Papua New Guinea. *Exp Parasitol* 141:134-137.  
579 <https://doi.org/10.1016/j.exppara.2014.03.021> PMID: 24703974
- 580 68. Shrestha RD, Grinberg A, Dukkupati VS, Pleydell EJ, Prattley DJ, French NP (2014)  
581 Infections with multiple *Cryptosporidium* species and new genetic variants in young  
582 dairy calves on a farm located within a drinking water catchment area in New Zealand.  
583 *Vet Parasitol* 202:287-291. <https://doi.org/10.1016/j.vetpar.2014.03.034> PMID:  
584 24780161
- 585 69. Giangaspero A, Papini R, Marangi M, Koehler AV, Gasser RB (2014)  
586 *Cryptosporidium parvum* genotype IIa and *Giardia duodenalis* assemblage A in  
587 *Mytilus galloprovincialis* on sale at local food markets. *Int J Food Microbiol* 171:62-  
588 67. <https://doi.org/10.1016/j.ijfoodmicro.2013.11.022> PMID: 24334090
- 589 70. Waldron LS, Dimeski B, Beggs PJ, Ferrari BC, Power ML (2011) Molecular  
590 epidemiology, spatiotemporal analysis, and ecology of sporadic human  
591 cryptosporidiosis in Australia. *Appl Environ Microbiol* 77:7757-7765. [https://doi.org/](https://doi.org/10.1128/AEM.00615-11)  
592 [10.1128/AEM.00615-11](https://doi.org/10.1128/AEM.00615-11) PMID: 21908628
- 593 71. Deshpande AP, Jones BL, Connelly L, Pollock KG, Brownlie S, Alexander CL (2015)  
594 Molecular characterization of *Cryptosporidium parvum* isolates from human

595 cryptosporidiosis cases in Scotland. *Parasitology* 142:318-325. [https://doi.org/](https://doi.org/10.1017/S0031182014001346)  
596 [10.1017/S0031182014001346](https://doi.org/10.1017/S0031182014001346) PMID: 25244937

597 72. Osman M, Benamrouz S, Guyot K, El Safadi D, Mallat H, Dabboussi F, et al. (2018)  
598 Molecular epidemiology of *Cryptosporidium* spp. in North Lebanon. *J Infect Dev*  
599 *Ctries* 12:34S. <https://doi.org/10.3855/jidc.10014> PMID: 31805009

600 73. Mahfouz ME, Mira N, Amer S (2014) Prevalence and genotyping of *Cryptosporidium*  
601 spp. in farm animals in Egypt. *J Vet Med Sci* 76:1569-1575.  
602 <https://doi.org/10.1292/jvms.14-0272> PMID: 25649937

603 74. Mi R, Wang X, Huang Y, Zhou P, Liu Y, Chen Y, et al. (2014) Prevalence and molecular  
604 characterization of *Cryptosporidium* in goats across four provincial level areas in  
605 China. *PLoS One* 9:e111164. <https://doi.org/10.1371/journal.pone.0111164> PMID:  
606 25343501

607 75. Naguib D, El-Gohary AH, Mohamed AA, Roellig DM, Arafat N, Xiao L (2018) Age  
608 patterns of *Cryptosporidium* species and *Giardia duodenalis* in dairy calves in Egypt.  
609 *Parasitol Int* 67:736-741. <https://doi.org/10.1016/j.parint.2018.07.012> PMID:  
610 30055334

611 76. Mercado R, Pena S, Ozaki LS, Fredes F, Godoy J (2015) Multiple *Cryptosporidium*  
612 *parvum* subtypes detected in a unique isolate of a Chilean neonatal calf with diarrhea.  
613 *Parasitol Res* 114:1985-19888. <https://doi.org/10.1007/s00436-015-4364-8> PMID:  
614 25673079

615 77. Al-Habsi K, Yang R, Williams A, Miller D, Ryan U, Jacobson C (2017) Zoonotic  
616 *Cryptosporidium* and *Giardia* shedding by captured rangeland goats. *Vet Parasitol Reg*  
617 *Stud Reports* 7:32-35. <https://doi.org/10.1016/j.vprsr.2016.11.006> PMID: 31014653

- 618 78. Chalmers RM, Robinson G, Elwin K, Elson R (2019) Analysis of the *Cryptosporidium*  
619 spp. and *gp60* subtypes linked to human outbreaks of cryptosporidiosis in England and  
620 Wales, 2009 to 2017. *Parasit Vectors* 12:95. [https://doi.org/10.1186/s13071-019-3354-](https://doi.org/10.1186/s13071-019-3354-6)  
621 [6](https://doi.org/10.1186/s13071-019-3354-6) PMID: 30867023
- 622 79. Connelly L, Craig BH, Jones B, Alexander CL (2013) Genetic diversity of  
623 *Cryptosporidium* spp. within a remote population of soay sheep on St. Kilda Islands,  
624 Scotland. *Appl Environ Microbiol* 79:2240-2246.  
625 <https://doi.org/10.1128/AEM.02823-12> PMID: 23354707
- 626 80. Del Coco VF, Cordoba MA, Bilbao G, de Almeida Castro AP, Basualdo JA, Fayer R,  
627 et al. (2014) *Cryptosporidium parvum gp60* subtypes in dairy cattle from Buenos Aires,  
628 Argentina. *Res Vet Sci* 96:311-314. <https://doi.org/10.1016/j.rvsc.2013.12.010> PMID:  
629 24480390
- 630 81. Abeywardena H, Jex AR, Nolan MJ, Haydon SR, Stevens MA, McAnulty RW, et al.  
631 (2012) Genetic characterisation of *Cryptosporidium* and *Giardia* from dairy calves:  
632 discovery of species/genotypes consistent with those found in humans. *Infect Genet*  
633 *Evol* 12:1984-1993. <https://doi.org/10.1016/j.meegid.2012.08.004> PMID: 22981927
- 634 82. Nolan MJ, Jex AR, Koehler AV, Haydon SR, Stevens MA, Gasser RB (2013)  
635 Molecular-based investigation of *Cryptosporidium* and *Giardia* from animals in water  
636 catchments in Southeastern Australia. *Water Res* 47:1726-1740. [https://doi.org/](https://doi.org/10.1016/j.watres.2012.12.027)  
637 [10.1016/j.watres.2012.12.027](https://doi.org/10.1016/j.watres.2012.12.027) PMID: 23357792
- 638 83. O'Brien E, McInnes L, Ryan U (2008) *Cryptosporidium gp60* genotypes from humans  
639 and domesticated animals in Australia, North America and Europe. *Exp Parasitol*  
640 118:118-121. <https://doi.org/10.1016/j.exppara.2007.05.012> PMID: 17618622

- 641 84. Quilez J, Torres E, Chalmers RM, Robinson G, Del Cacho E, Sanchez-Acedo C (2008)  
642 *Cryptosporidium* species and subtype analysis from dairy calves in Spain. Parasitology  
643 135:1613-1620. <https://doi.org/10.1017/S0031182008005088> PMID: 18980704
- 644 85. Mirhashemi ME, Zintl A, Grant T, Lucy F, Mulcahy G, De Waal T (2016) Molecular  
645 epidemiology of *Cryptosporidium* species in livestock in Ireland. Vet Parasitol 216:18-  
646 22. <https://doi.org/10.1016/j.vetpar.2015.12.002> PMID: 26801590
- 647 86. Santin M, Zarlenga DS (2009) A multiplex polymerase chain reaction assay to  
648 simultaneously distinguish *Cryptosporidium* species of veterinary and public health  
649 concern in cattle. Vet Parasitol 166:32-37. <https://doi.org/10.1016/j.vetpar.2009.07.039>  
650 PMID: 19713046  
651

652 **Figure legend**

653 **Figure 1.** Sequence comparisons between *C. bovis* and *C. ryanae* for the partial 18S rRNA gene  
654 from Korean sequences obtained in this study and reference strains. Six nucleotide differences  
655 at 440, 460, 464–466, and 470 are shown. An asterisk indicates sequences obtained in this  
656 study.

Table 1. Prevalence and distribution of *Cryptosporidium* species according to age group in pre-weaned calves

| Age (days) | Sample size | No. of positive (%) | 95% CI    | <i>Cryptosporidium</i> species (No.) |                  |                 |
|------------|-------------|---------------------|-----------|--------------------------------------|------------------|-----------------|
|            |             |                     |           | <i>C. parvum</i>                     | <i>C. ryanae</i> | <i>C. bovis</i> |
| 1–10       | 271         | 53 (19.6%)          | 14.8–24.3 | 49                                   | 3                | 1               |
| 11–20      | 92          | 24 (26.1%)          | 17.1–35.1 | 23                                   | 1                | 0               |
| 21–30      | 39          | 3 (7.7%)            | 0.0–16.1  | 0                                    | 3                | 0               |
| 31–60      | 58          | 6 (10.3%)           | 2.5–18.2  | 0                                    | 5                | 1               |
| Total      | 460         | 86 (18.7%)          | 15.1–22.3 | 72                                   | 12               | 2               |

Table 2. Distribution of *Cryptosporidium* species in pre-weaned Korean native calves according to age group

| Age (days)   | Frequency of <i>C. parvum</i> positivity (%) | $\chi^2$ ( <i>P</i> -value) | Frequency of <i>C. ryanae</i> positivity (%) | $\chi^2$ ( <i>P</i> -value) | Frequency of <i>C. bovis</i> positivity (%) | $\chi^2$ ( <i>P</i> -value) |
|--------------|----------------------------------------------|-----------------------------|----------------------------------------------|-----------------------------|---------------------------------------------|-----------------------------|
| 1–10         | 49/271 (18.1%)                               |                             | 3/271 (1.1%)                                 |                             | 1/271 (0.4%)                                |                             |
| 11–20        | 23/92 (25.0%)                                | 25.300 (0.000)              | 1/92 (1.1%)                                  | 16.020 (0.001)              | 0                                           | 2.824 (0.419)               |
| 21–30        | 0                                            |                             | 3/39 (7.7%)                                  |                             | 0                                           |                             |
| 31–60 (Ref.) | 0                                            |                             | 5/58 (8.6%)                                  |                             | 1/58 (1.7%)                                 |                             |

1 Table 3. Distribution of *Cryptosporidium parvum* subtype according to age group

| <i>gp60</i> subtypes | Age groups (days) |       | No. of positive calves |
|----------------------|-------------------|-------|------------------------|
|                      | 1–10              | 11–20 |                        |
| IIaA14G1R1           | 1                 | 0     | 1 (1.4%)               |
| IIaA14G3R1           | 1                 | 0     | 1 (1.4%)               |
| IIaA15G1R1           | 1                 | 0     | 1 (1.4%)               |
| IIaA15G2R1           | 3                 | 0     | 3 (4.2%)               |
| IIaA16G4R1           | 1                 | 1     | 2 (2.8%)               |
| IIaA17G3R1           | 1                 | 3     | 4 (5.6%)               |
| IIaA17G4R1           | 1                 | 1     | 2 (2.8%)               |
| IIaA18G3R1           | 36                | 16    | 52 (72.2%)             |
| IIaA19G1R1           | 1                 | 0     | 1 (1.4%)               |
| IIaA19G3R1           | 0                 | 2     | 2 (2.8%)               |
| IIaA19G4R1           | 3                 | 0     | 3 (4.2%)               |
| Total                | 46                | 26    | 72                     |

2



|                               | 430        | 440        | 450        | 460        | 465  | 470  |
|-------------------------------|------------|------------|------------|------------|------|------|
| * MZ736398 C. bovis Korea     | GTAGTTAATC | TTCTGTTAAT | TTTTATATAT | AATATCACGA |      |      |
| * MZ736399 C. bovis Korea     |            |            |            |            |      |      |
| KX342025 C. bovis Korea       |            |            |            |            |      |      |
| FJ796284 C. bovis Japan       |            |            |            |            |      |      |
| MN540745 C. bovis Japan       |            |            |            |            |      |      |
| MN696246 C. bovis China       | A          |            |            |            |      |      |
| MT703861 C. bovis China       |            |            |            |            |      |      |
| MT835227 C. bovis China       |            |            |            |            |      |      |
| MW767057 C. bovis China       |            |            |            |            |      |      |
| MN918118 C. bovis Turkey      |            |            |            |            |      |      |
| MZ027077 C. bovis Turkey      |            |            |            |            |      |      |
| MT043859 C. bovis India       |            |            |            |            |      |      |
| MT150693 C. bovis Iraq        |            |            |            |            |      |      |
| MT611087 C. bovis Austria     |            |            |            |            |      |      |
| MW043438 C. bovis Bangladesh  |            |            |            |            |      |      |
| MW788440 C. bovis Thailand    |            |            |            |            |      |      |
| * MZ736386 C. ryanae Korea    |            | T          |            | C          | GCT  | G    |
| * MZ736387 C. ryanae Korea    | A          | A          | G          | C          | GGCT | G    |
| * MZ736388 C. ryanae Korea    |            | T          |            | C          | GCT  | G    |
| * MZ736389 C. ryanae Korea    |            | T          | G          | A          | GCT  | G    |
| * MZ736390 C. ryanae Korea    | A          | A          | T          | G          | A    | GGCT |
| * MZ736391 C. ryanae Korea    |            | T          |            | A          | A    | GCT  |
| * MZ736392 C. ryanae Korea    |            | T          |            | C          | GCT  | G    |
| * MZ736393 C. ryanae Korea    |            | T          | A          | C          | GAT  | G    |
| * MZ736394 C. ryanae Korea    |            | T          |            | C          | GCT  | G    |
| * MZ736395 C. ryanae Korea    |            | T          |            | C          | GCT  | G    |
| * MZ736396 C. ryanae Korea    |            | T          |            | C          | GCT  | G    |
| * MZ736397 C. ryanae Korea    |            | T          | A          | A          | C    | GCT  |
| JN400880 C. ryanae India      |            | T          |            | C          | GCT  | G    |
| MH458438 C. ryanae Brazil     |            | T          |            | C          | GCT  | G    |
| MK501765 C. ryanae Greece     |            | T          |            | C          | GCT  | G    |
| MN540747 C. ryanae Japan      |            | T          |            | C          | GCT  | G    |
| MW043439 C. ryanae Bangladesh |            | T          |            | C          | GCT  | G    |
| MK982509 C. ryanae Bangladesh |            | T          |            | C          | CT   | G    |
| MK982468 C. ryanae Bangladesh |            | T          |            | C          | GCT  | G    |
| MH754181 C. ryanae China      |            | T          |            | C          | GCT  | G    |
| MT002726 C. ryanae China      |            | T          |            | C          | GCT  | G    |
| KP793013 C. ryanae China      |            | T          |            | C          | GCT  | G    |
| MT611097 C. ryanae Austria    |            | T          |            | C          | GCT  | G    |
| KT922235 C. ryanae Ethiopia   |            | T          |            | C          | GCT  | G    |
| MW788448 C. ryanae Thailand   |            | T          |            | C          | GCT  | G    |
| AB777177 C. ryanae Egypt      |            | T          |            | C          | GCT  | G    |
